# Supplementary material for: The role of Tre6P and SnRK1 in maize early kernel development and events leading to stress-induced kernel abortion
Source: BMC Plant Biol. 2017 Apr 12;17:74. doi: 10.1186/s12870-017-1018-2 (PMC5389189; doi:10.1186/s12870-017-1018-2)
Supplement: Supplementary file 2 — Kernels harvested 3 DAP were assessed for the effect of long term (9 d) sucrose starvation on kernel growth (g−1 fw). After sterilization, B73 kernels were plated on MS agar and incubated in the dark at 24 °C. Control kernels on continuous sucrose are indicated by SUC (150 mM), and sucrose starved kernels are indicated by NS (no sucrose). Individual kernels from three seperate ears were weighed each day and returned to the medium. (XLSX 11 kb) [file 12870_2017_1018_MOESM2_ESM.xlsx]

## Sheet: Additional File 1 - Table S1
	Kernel 1 (g)		Kernel 2 (g)		Kernel 3 (g)
Time (d)	SUC	NS	SUC	NS	SUC	NS
0	0.062	0.062	0.042	0.042	0.044	0.044
1	0.071	0.044	0.053	0.056	0.042	0.037
2	0.06	0.06	0.064	0.063	0.036	0.048
3	0.069	0.057	0.051	0.048	0.039	0.032
4	0.043	0.078	0.042	0.046	0.037	0.033
5	0.066	0.057	0.038	0.054	0.025	0.04
6	0.058	0.064	0.059	0.057	0.035	0.04
7	0.074	0.067	0.06	0.067	0.055	0.038
8	0.062	0.055	0.058	0.043	0.036	0.04
9	0.073	0.059	0.048	0.05	0.063	0.033
